# Supplementary material for: Model-based reuse for crosscutting frameworks: assessing reuse and maintenance effort
Source: Springer Nature journal article supplement (doi:10.1186/2195-1721-1-4), 2013-10-29
Supplement: 40411_2013_4_MOESM4_ESM.pdf [file 40411_2013_4_MOESM4_ESM.pdf]

 Pointcut: Connection Opening

Provide the names of methods which should execute only after a database connection is opened.

**base.Customer.opening();**

 Pointcut: Connection Closing

Provide the names of methods which execute before a database connection should be closed.

**base.Customer.closing();**

 Pointcut: Transactional Methods

Provide the names of method which represent a database transaction.

**base.Customer.commitOrder();**

 TypeExtension: Persistent Objects

Provide the name of classes that represent objects that should be persisted.

**base.Customer; base.Resource; base.Order;**

Value: Dirty Objects Controller

Specify if the persistent objects records should be updated automatic...

**true**

Value: Database Connection String

Provide the connection string necessary to connect to the database.

**"127.0.0.1:5050/basename"**

Value: Database Username

Provide the username needed to connect to the database.

**"BaseOwner"**

Value: Database Password

Provide the password needed to connect to the database.

**"BasePassword"**

 Palette

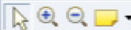

 Group

 Pointcut

 TypeExtension

Value

Option

 OptionGroup
