# Supplementary material for: Model-based reuse for crosscutting frameworks: assessing reuse and maintenance effort
Source: Springer Nature journal article supplement (doi:10.1186/2195-1721-1-4), 2013-10-29
Supplement: 40411_2013_4_MOESM7_ESM.pdf [file 40411_2013_4_MOESM7_ESM.pdf]

### 1.1 - Application Database Name

Please insert the value between quotes.

?

### 1.2 - Database Management System Name

Please insert the value between quotes.

?

### 1.3 - Database Connection Driver Name

Please insert the value between quotes.

?

### 1.4 - Database Connection Protocol

Please insert the value between quotes.

?

### 2.1 - Connection Opening Joinpoints

Please insert the method name in "package.Class.method" format.

[]

### 2.2 - Connection Closing Joinpoints

Please insert the method name in "package.Class.method" format.

[]

### 3.1 - Classes that Represent Persistent Objects

Please insert the method name in "package.Class.method" format.

[]
