# Supplementary material for: Model-based reuse for crosscutting frameworks: assessing reuse and maintenance effort
Source: Springer Nature journal article supplement (doi:10.1186/2195-1721-1-4), 2013-10-29
Supplement: 40411_2013_4_MOESM8_ESM.pdf [file 40411_2013_4_MOESM8_ESM.pdf]

### 1.1 - Application Database Name

Please insert the value between quotes.

"airlinedb"

### 1.2 - Database Management System Name

Please insert the value between quotes.

"derby"

### 1.3 - Database Connection Driver Name

Please insert the value between quotes.

"org.apache.derby.jdbc.EmbeddedDriver"

### 1.4 - Database Connection Protocol

Please insert the value between quotes.

"jdbc:derby:"

## 2.1 - Connection Opening Joinpoints

Please insert the method name in "package.Class.method" format.

[baseapp.Airplane.landing,baseapp.Airport.opening,baseapp.Luggage.dispatch...

## 2.2 - Connection Closing Joinpoints

Please insert the method name in "package.Class.method" format.

[baseapp.Airplane.takeoff,baseapp.Airport.closing,baseapp.Luggage.retrieve...

## 3.1 - Classes that Represent Persistent Objects

Please insert the method name in "package.Class.method" format.

[baseapp.Airplane,baseapp.Airport,baseapp.Luggage,baseapp.Passenger...
