# Supplementary material for: Model-based reuse for crosscutting frameworks: assessing reuse and maintenance effort
Source: Springer Nature journal article supplement (doi:10.1186/2195-1721-1-4), 2013-10-29
Supplement: 40411_2013_4_MOESM9_ESM.pdf [file 40411_2013_4_MOESM9_ESM.pdf]

```
package persistence.reuse;
import persistence.instantiation.helper.ExtendedConnectionVariabilities;
public aspect ConcreteExtendedConnectionVariabilities0 extends
ExtendedConnectionVariabilities {
    public String ExtendedConnectionVariabilities.setDatabaseName () {
        return "airlinedb";
    }
    public String ExtendedConnectionVariabilities.setSpecificDatabase () {
        return "derby";
    }
    public String ExtendedConnectionVariabilities.getDriver () {
        return "org.apache.derby.jdbc.EmbeddedDriver";
    }
    public String ExtendedConnectionVariabilities.getJDBC () {
        return "jdbc:derby:";
    }
}
```
