# Supplementary material for: Model-based reuse for crosscutting frameworks: assessing reuse and maintenance effort
Source: Springer Nature journal article supplement (doi:10.1186/2195-1721-1-4), 2013-10-29
Supplement: 40411_2013_4_MOESM10_ESM.pdf [file 40411_2013_4_MOESM10_ESM.pdf]

```
package persistence.reuse;
import persistence.instantiation.helper.ExtendedConnectionCompositionRules;
public aspect ConcreteExtendedConnectionCompositionRules1 extends
    ExtendedConnectionCompositionRules {
    public pointcut openConnection ():
        (
            execution (* baseapp.Airplane.landing(..)) ||
            execution (* baseapp.Airport.opening(..)) ||
            execution (* baseapp.Luggage.dispatch(..)) ||
            execution (* baseapp.Checkin.confirm(..)) ||
            execution (* baseapp.Passenger.board(..)) ||
            execution (* baseapp.Flight.depart(..))
        );
    public pointcut closeConnection ():
        (
            execution (* baseapp.Airplane.takeoff(..)) ||
            execution (* baseapp.Airport.closing(..)) ||
            execution (* baseapp.Luggage.retrieve(..)) ||
            execution (* baseapp.Checkin.cancel(..)) ||
            execution (* baseapp.Passenger.unboard(..)) ||
            execution (* baseapp.Flight.arrive(..))
        );
}
```
