# Supplementary material for: Model-based reuse for crosscutting frameworks: assessing reuse and maintenance effort
Source: Springer Nature journal article supplement (doi:10.1186/2195-1721-1-4), 2013-10-29
Supplement: 40411_2013_4_MOESM11_ESM.pdf [file 40411_2013_4_MOESM11_ESM.pdf]

```
package persistence.reuse;
public aspect ParentsDeclaration extends Object {
    declare parents : baseapp.Airplane implements
        persistence.PersistentRoot;
    declare parents : baseapp.Airport implements
        persistence.PersistentRoot;
    declare parents : baseapp.Luggage implements
        persistence.PersistentRoot;
    declare parents : baseapp.Checkin implements
        persistence.PersistentRoot;
    declare parents : baseapp.Passenger implements
        persistence.PersistentRoot;
    declare parents : baseapp.Flight implements
        persistence.PersistentRoot;
}
```
