# Supplementary material for: Model-based reuse for crosscutting frameworks: assessing reuse and maintenance effort
Source: Springer Nature journal article supplement (doi:10.1186/2195-1721-1-4), 2013-10-29

### First Maintenance Execution

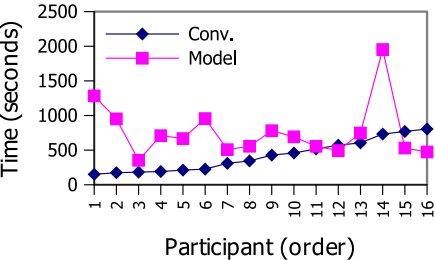

### Second Maintenance Execution

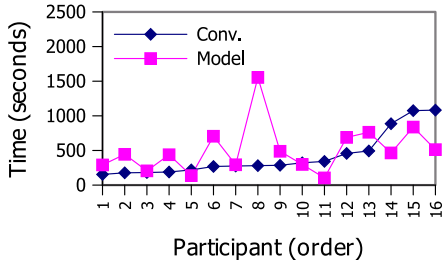

Supplement: 40411_2013_4_MOESM15_ESM.pdf [file 40411_2013_4_MOESM15_ESM.pdf]
